# Supplementary material for: Techno-ecologically synergistic food–energy–water systems can meet human and ecosystem needs
Source: Royal Society of Chemistry journal article supplement (doi:10.1039/d1ee00843a), 2021-01-01
Supplement: d1ee00843a2.xlsx [file d1ee00843a2.xlsx]

## Sheet: Note
Supplementary Information 2: Techno-Ecologically Synergistic Food-Energy-Water Systems can Meet Human and Ecosystem Needs
Kyuha Lee1, Sami Khanal2, and Bhavik R. Bakshi*1
1 William G. Lowrie Department of Chemical and Biomolecular Engineering, The Ohio State University, Columbus, Ohio 43210, USA
2 Department of Food, Agricultural, and Biological Engineering, The Ohio State University, Columbus, Ohio 43210, USA
* Corresponding author: B.R. Bakshi (bakshi.2@osu.edu)
	S1: Detailed data for Fig. 4
	S2: Detailed data for Fig. S2
	S3: Detailed data for Fig. S5
	S4: Detailed data for Table 1 and Figs. 5, S3, S4, and S6

## Sheet: S1
S1: Detailed data for Fig. 4
Categories	Flows	Units	Mining	Thermoelectric	Residential	Commercial	Industrial	Agricultural	Transportation	Wastewater Treatment	Ecosystem Supply	Total
Climate Regulation	CO2 Emissions	Million tCO2eq/y	1.72669	17.489	0.09432	0.03314	0.8447	0.00234	0.86317	0.17274	0	21.2262
	CO2 Sequestration	Million tCO2eq/y	0	0	0	0	0	0	0	0	1.83287	1.83287
Air Pollutant	NOx Emissions	Thousand t/y	2.4986	14.7225	0.20229	0.07108	1.0581	0.000171067	2.9216	0.05326	0	21.5276
	NOx Removal	Thousand t/y	0	0	0	0	0	0	0	0	0.47835	0.47835
	SO2 Emissions	Thousand t/y	0.03641	56.9713	0.02958	0.04571	1.58025	4.41676e-05	0.0158	0.01295	0	58.6921
	SO2 Removal	Thousand t/y	0	0	0	0	0	0	0	0	1.62621	1.62621
	PM2.5 Emissions	Thousand t/y	0.09179	1.76218	0.48694	0.03473	0.53319	0.74831	0.70792	0.21721	0	4.58227
	PM2.5 Removal	Thousand t/y	0	0	0	0	0	0	0	0	0.47602	0.47602
	PM10 Emissions	Thousand t/y	0.40254	2.02127	0.48898	0.03945	0.61997	3.73914	4.88233	0.26212	0	12.4558
	PM10 Removal	Thousand t/y	0	0	0	0	0	0	0	0	4.53541	4.53541
	CO Emissions	Thousand t/y	1.44536	1.30972	3.05802	0.06735	11.2612	0.00576	16.7039	1.19815	0	35.0495
	CO Removal	Thousand t/y	0	0	0	0	0	0	0	0	0.21269	0.21269
Water Nutrient Emissions	N Emissions	Thousand t/y	0.37273	0.1525	0.12196	0	0.12035	7.16978	0	0	0	7.93732
	N Removal	Thousand t/y	0	0	0	0	0	0	0	0	0.05678	0.05678
	P Emissions	Thousand t/y	0.00315	0.01132	0.01159	0	0.0046	1.92521	0	0	0	1.95587
	P Removal	Thousand t/y	0	0	0	0	0	0	0	0	0.00437	0.00437
Water Consumption	Consumption	Million m3/y	2.6151	18.6802	1.98223	1.36284	1.69228	0.52365	0	0	0	26.8563
	Supply	Million m3/y	0	0	0	0	0	0	0	0	1363.02	1363.02
Flows (k)	TES Index (Vk)
CO2	-0.91365
NOx	-0.97778
SO2	-0.972293
PM2.5	-0.896117
PM10	-0.63588
CO2	-0.993932
N	-0.992846
P	-0.997766
Water	49.7522
* Data sources are shown in Table S1 of the Supplementary Information.

## Sheet: S2
S2: Detailed data for Fig. S2
Power Plants	CO2 Emissions	NOx Emissions	SO2 Emissions	Water Withdrawal	Water Consumption	Thermal Water Emissions
	[t/TJ_elec]	[t/TJ_elec]	[t/TJ_elec]	[Thousand m3/TJ_elec]	[Thousand m3/TJ_elec]	[GJ/TJ_elec]
CST w.OT	281.662	0.22808	4.22807	29.4923	0.20975	249.785
CST w.RE	313.771	0.40345	0.25672	1.57244	0.27579	12.9989
NGCC w.RE	117.897	0.01062	0.000602296	0.22268	0.18902	0.86992
* Data sources are shown in Table S1 of the Supplementary Information.

## Sheet: S3
S3: Detailed data for Fig. S5
Converted CO2	CO2 conversion to methane			CO2 conversion to syngas			CO2 conversion to formic acid
	Marginal Profits	Marginal External Benefits	Marginal Total Profits	Marginal Profits	Marginal External Benefits	Marginal Total Profits	Marginal Profits	Marginal External Benefits	Marginal Total Profits
[Thousand t/y]	[Billion $/y]	[Billion $/y]	[Billion $/y]	[Billion $/y]	[Billion $/y]	[Billion $/y]	[Billion $/y]	[Billion $/y]	[Billion $/y]
0	0.41678	0.23318	0.64996	0.41678	0.23318	0.64996	0.41678	0.23318	0.64996
100	0.14652	0.23418	0.3807	0.15068	0.2383	0.38898	0.26369	0.24089	0.50458
200	-0.12373	0.23517	0.11144	-0.11541	0.24342	0.12801	0.11061	0.2486	0.35921
300	-0.39398	0.23617	-0.15781	-0.3815	0.24854	-0.13296	-0.04247	0.25631	0.21384
400	-0.66423	0.23717	-0.42706	-0.6476	0.25366	-0.39394	-0.19555	0.26402	0.06847
500	-0.93448	0.23817	-0.69631	-0.91369	0.25878	-0.65491	-0.34863	0.27174	-0.07689
600	-1.20473	0.23917	-0.96556	-1.17978	0.2639	-0.91588	-0.50171	0.27945	-0.22226
700	-1.47498	0.24017	-1.23481	-1.44587	0.26902	-1.17685	-0.65479	0.28716	-0.36763

## Sheet: S4
S4: Detailed data for Table 1 and Figs. 5, S3, S4, and S6
Categories		Units	Base case	Fuel (thermoelectric)			Cooling			Fuel (renewable)		CO2 conversion			Technological solution	Tillage practices				Land use		Agro-ecological solution	Synergistic solution
				CST w.RE	Con. NGCC w.RE	Shale NGCC w.RE	Shale NGCC w.OT	Shale NGCC w.RE	Shale NGCC w.Dry	Solar PV adopted	Wind adopted	Methane	Syngas	Formic acid		No-till	Conserv. till	Reduc. till	Intens. till	Reforestation	Wetland
Climate Regulation	CO2 Emissions	Million tCO2eq/y	21.2261	29.2582	13.9383	13.9303	13.8806	13.9303	14.0818	12.789	13.8781	21.0771	20.4789	20.107	11.6699	21.2244	21.2271	21.2299	21.239	21.2261	21.2261	21.2244	0.889567
	CO2 Sequestration	Million tCO2eq/y	1.83287	1.83287	1.83287	1.83287	1.83287	1.83287	1.83287	1.83287	1.83287	1.83287	1.83287	1.83287	1.83287	1.86301	1.81529	1.76756	1.74937	1.84308	1.83287	1.86301	1.86301
	V_CO2	-	-0.91365	-0.937355	-0.868501	-0.868426	-0.867954	-0.868426	-0.869841	-0.856684	-0.867931	-0.91304	-0.910499	-0.908844	-0.84294	-0.912223	-0.914483	-0.916742	-0.917634	-0.913169	-0.91365	-0.912223	1.09429
Water Quality	N Emissions	Thousand t/y	7.93732	8.41409	7.42547	7.47529	7.48076	7.47529	7.46207	7.4695	7.47503	7.93597	7.93537	7.93607	7.46798	7.78487	7.9744	8.22571	8.43885	6.25084	7.93732	7.78487	7.26085
	N Removal	Thousand t/y	0.056784	0.056784	0.056784	0.056784	0.056784	0.056784	0.056784	0.056784	0.056784	0.056784	0.056784	0.056784	0.056784	0.056784	0.056784	0.056784	0.056784	0.056784	0.186576	0.186576	0.186576
	V_N	-	-0.992846	-0.993251	-0.992353	-0.992404	-0.992409	-0.992404	-0.99239	-0.992398	-0.992403	-0.992845	-0.992844	-0.992845	-0.992396	-0.992706	-0.992879	-0.993097	-0.993271	-0.990916	-0.976494	-0.976033	-0.974304
Water Quantity	Water Consumption	Million m3/y	26.8564	32.1901	22.9043	23.9331	16.8574	23.9331	8.16409	22.3269	23.8531	30.5725	30.3189	25.8281	21.2986	26.8513	26.8579	26.8689	26.8927	26.8564	26.8564	26.8564	6.12441
	Water Supply	Million m3/y	1363.02	1363.02	1363.02	1363.02	1363.02	1363.02	1363.02	1363.02	1363.02	1363.02	1363.02	1363.02	1363.02	1363.77	1362.97	1361.8	1361.23	1362.71	1365.32	1366.07	1366.07
	V_Water	-	49.7522	41.3429	58.5093	55.9512	79.856	55.9512	165.953	60.0483	56.1423	43.5832	43.9561	51.7727	62.9957	49.7896	49.7474	49.6832	49.617	49.7407	49.838	49.8658	222.053
Energy	Electricity Consumption	Thousand TJ/y	49.3757	53.157	46.5618	46.5618	46.0541	46.5618	48.7682	46.3218	46.5508	59.0146	57.9427	52.1244	49.0706	49.3757	49.3757	49.3757	49.3757	49.3757	49.3757	49.3757	46.8042
	Electricity Generation	Thousand TJ/y	84.362	84.362	84.362	84.362	84.362	84.362	84.362	84.362	84.362	84.362	84.362	84.362	84.362	84.362	84.362	84.362	84.362	84.362	84.362	84.362	84.362
	Marginal Net Electricity Generation	Thousand TJ/y	0	-3.78135	2.81387	2.81387	3.32158	2.81387	0.607514	3.05385	2.82484	-9.63891	-8.56707	-2.74877	0.30509	0	0	0	0	0	0	0	2.57151
Food	Corn Production	Thousand t/y	216.58	216.58	216.58	216.58	216.58	216.58	216.58	216.58	216.58	216.58	216.58	216.58	216.58	216.334	216.699	217.174	217.407	216.58	216.58	216.334	217.65
	Marginal Corn Production	Thousand t/y	0	0	0	0	0	0	0	0	0	0	0	0	0	-0.24674	0.118607	0.593529	0.826419	0	0	-0.24674	1.07
Economic Indicators	Marginal Revenue	Million $/y	0	-122.251	90.9724	90.9724	107.387	90.9724	19.6409	98.7311	91.327	-311.626	-276.974	-88.8678	9.86355	-0.0404654	0.0194516	0.0973388	0.135533	0	0	-0.0404654	83.3125
	Marginal Cost	Million $/y	0	321.182	528.212	-327.407	-373.832	-327.407	-186.04	-318.034	-327.594	766.125	775.509	511.573	205.417	-0.936945	1.24249	1.24082	1.23915	0.0154999	4.15335	3.2164	297.153
	Marginal Profits	Million $/y	0	-443.434	-437.239	418.38	481.219	418.38	205.681	416.765	418.921	-1077.75	-1052.48	-600.441	-195.553	0.896479	-1.22304	-1.14348	-1.10362	-0.0154999	-4.15335	-3.25687	-213.841
	Marginal External Beneftis	Million $/y	0	-222.06	201.583	201.695	203.261	201.695	198.001	233.177	203.135	3.99945	20.4795	30.8463	264.024	1.13694	-0.570261	-2.38688	-3.48754	2.90457	0.269185	1.40598	562.741
* Data sources are shown in Table S1 of the Supplementary Information.
